# Supplementary material
Source: MDPI journal article supplement (https://www.mdpi.com/1424-2818/15/7/795)
Supplement: s1 [file s1]

Table S1. GenBank accessions of representative taxa from *Bionectriaceae*, *Cordycipitaceae* and outgroups included in the phylogenetic analyses.

| Species                              | Strain number               | GenBank accession numbers <sup>1</sup> |             |             | Citation |
|--------------------------------------|-----------------------------|----------------------------------------|-------------|-------------|----------|
|                                      |                             | ITS                                    | LSU         | <i>tef1</i> |          |
| <i>Acremonium alternatum</i>         | CBS 407.66 <sup>T</sup>     | NR_144913.1                            | MH870479.1  | NA          | [1,2]    |
| <i>Ac. behniae</i>                   | CBS 146824 <sup>T</sup>     | NR_171996.1                            | NG_074497.1 | NA          | [3]      |
| <i>Ac. curvum</i>                    | GZUIFR 22.035 <sup>T</sup>  | ON041034                               | ON041050    | ON494579    | [4]      |
| <i>Ac. egyptiacum</i>                | CBS 303.64                  | MH858438.1                             | MH870069.1  | NA          | [1]      |
| <i>Ac. globosporium</i>              | GZUIFR 22.036 <sup>T</sup>  | ON041035                               | ON041051    | ON494580    | [4]      |
| <i>Ac. sclerotigenum</i>             | A101                        | KC987139                               | KC987215    | KC998961    | [5]      |
| <i>Ac. sordidulum</i>                | CBS 385.73 <sup>T</sup>     | NR_159618.1                            | MH872418.1  | NA          | [1]      |
| <i>Beauveria bassiana</i>            | ARSEF 1564 <sup>T</sup>     | NR_111594.1                            | -           | NA          | [6]      |
| <i>B. caledonica</i>                 | ARSEF 2567 <sup>T</sup>     | HQ880817.1                             | NG_058620.1 | NA          | [6]      |
| <i>Clonostachys buxi</i>             | CBS 696.93                  | KM231840.1                             | KM231721.1  | NA          | [7]      |
| <i>C. grammiscospora</i>             | CBS 209.93 <sup>T</sup>     | NR_137650.1                            | MH874052.1  | NA          | [1,8]    |
| <i>C. leucaenae</i>                  | MFLU 19-0970 <sup>T</sup>   | ON230050.1                             | ON230058.1  | NA          | [9]      |
| <i>C. rosea</i>                      | CBS 710.86                  | MH862010.1                             | MH873700.1  | NA          | [1]      |
| <i>C. spinulosa</i>                  | MFLU 18-2730 <sup>T</sup>   | ON230049.1                             | ON230057.1  | NA          | [9]      |
| <i>Cordyceps javanica</i>            | CBS 134.22 <sup>T</sup>     | MH854719.1                             | MG665231.1  | NA          | [1,10]   |
| <i>Emericellopsis salmosynnemata</i> | CBS 182.56 <sup>T</sup>     | MH857571.1                             | MH869115.1  | NA          | [1]      |
| <i>E. terricola</i>                  | CBS 120.40 <sup>T</sup>     | MH856058.1                             | MH867553.1  | NA          | [1]      |
| <i>Fusariella atrovirens</i>         | CBS 311.73                  | MH860688.1                             | MH872395.1  | NA          | [1]      |
| <i>F. curvata</i>                    | MFLUCC 15.0844              | KX025152.1                             | KX025154.1  | NA          | [11]     |
| <i>Geosmithia brunnea</i>            | CBS 142633 <sup>T</sup>     | NR_158517.1                            | -           | NA          | [12]     |
| <i>G. lavendula</i>                  | CBS 582.67                  | MH859054.1                             | MH870774.1  | NA          | [1]      |
| <i>G. microcorthyli</i>              | CCF 3861 <sup>T</sup>       | NR_137566.1                            | NG_067560.1 | NA          | [13]     |
| <i>Gliomastix murorum</i>            | CBS 154.25                  | MH854827.1                             | MH866327.1  | NA          | [1]      |
| <i>Gl. polychroma</i>                | CBS 181.27 <sup>T</sup>     | NR_119408.1                            | MH866417.1  | NA          | [14]     |
| <i>Gl. roseogrisea</i>               | CBS 134.56 <sup>T</sup>     | MH857544.1                             | MH869081.1  | NA          | [1]      |
| <i>Hapsidospora irregularis</i>      | CBS 510.70 <sup>T</sup>     | MH859824.1                             | MH871595.1  | NA          | [1]      |
| <i>Heleococcum aurantiacum</i>       | CBS 201.35                  | MH855645.1                             | MH867154.1  | NA          | [1]      |
| <i>H. japonense</i>                  | CBS 397.67                  | JX158420.1                             | JX158442.1  | NA          | [5]      |
| <i>Lasionectria germanica</i>        | CBS 143538 <sup>T</sup>     | -                                      | NG_073659.1 | NA          | [15]     |
| <i>L. marigotensis</i>               | CBS 131606 <sup>T</sup>     | KR105612.1                             | KR105613.1  | NA          | [16]     |
| <i>Lasionectriopsis pteridii</i>     | CBS 782.69 <sup>T</sup>     | MH859425.1                             | MH871198.1  | NA          | [1]      |
| <i>Metapochonia suchlasporia</i>     | CBS 251.83 <sup>T</sup>     | MH861580.1                             | MH873311.1  | NA          | [1]      |
| <i>Nectriopsis fuliginicola</i>      | CBS 400.82 <sup>T</sup>     | NR_154234.1                            | -           | NA          | [17]     |
| <i>N. lindauiana</i>                 | CBS 897.70 <sup>T</sup>     | NR_154235.1                            | -           | NA          | [17]     |
| <i>Nigrosabulum globosum</i>         | CBS 512.70 <sup>T</sup>     | MH859825.1                             | MH871597.1  | NA          | [1]      |
|                                      | CBS 514.70                  | MH859826.1                             | MH871598.1  | NA          | [1]      |
| <i>Ochronectria calami</i>           | CBS 125.87                  | -                                      | AY489717.1  | NA          | [18]     |
| <i>O. thailandica</i>                | MFLUCC 15-0140 <sup>T</sup> | NR_168756.1                            | KU564069.1  | NA          | [1]      |
| <i>Paracylindrocarpon aloicola</i>   | CBA 141300 <sup>T</sup>     | NR_154346.1                            | NG_058238.1 | NA          | [19]     |
| <i>P. pandanicola</i>                | KUMCC 17-0272 <sup>T</sup>  | NR_168197.1                            | NG_068837.1 | NA          | [20]     |
| <i>Pochonia chlamydospora</i>        | CBS 504.66                  | MH858871.1                             | MH870512.1  | NA          | [1]      |
| <i>Septofusidium berolinense</i>     | CBS 731.70                  | KM231841.1                             | KM231722.1  | NA          | [7]      |
| <i>Simplicillium lamellicola</i>     | CBS 116.25 <sup>T</sup>     | MH854806.1                             | MH866307.1  | NA          | [1]      |
| <i>S. lanosoniveum</i>               | CBS 123.42 <sup>T</sup>     | MH856100.1                             | MH867593.1  | NA          | [1]      |
| <i>Stephanonectria chromolaenae</i>  | MFLUCC 18-0589 <sup>T</sup> | ON230051.1                             | ON230059.1  | NA          | [9]      |
| <i>St. keithii</i>                   | CBS 100005                  | AF210671.1                             | -           | NA          | [8]      |

|                                  |                          |             |             |    |         |
|----------------------------------|--------------------------|-------------|-------------|----|---------|
|                                  | CBS 434.70               | MH859783.1  | MH871546.1  | NA | [1]     |
| <i>Stl. colubrensis</i>          | CBS 141857 <sup>†</sup>  | NR_173884.1 | NG_088099.1 | NA | [21]    |
| <i>Stl. gracilipes</i>           | MFLUCC 17-2614           | ON230052.1  | ON230060.1  | NA | [9]     |
| <i>Stl. macrostoma</i>           | CLLG18033                | MN497402.1  | MN497411.1  | NA | [21]    |
| <i>Stl. walteri</i>              | CBS 144627               | NR_160063.1 | -           | NA | [22]    |
| <i>Synnemellisia aurantia</i>    | COAD 2070 <sup>†</sup>   | NR_154444.1 | NG_059728.1 | NA | [23]    |
| <i>Sy. urenae</i>                | BRIP 71652 <sup>†</sup>  | NR_175758.1 | OK342134.1  | NA |         |
| <i>Verrucostoma freycinetiae</i> | MAFF 240100 <sup>†</sup> | NR_137761.1 | NG_059924.1 | NA | [24,25] |

ARSEF: Agricultural Research Service Collection of Entomopathogenic Fungal Cultures, USA; CBS: Culture Collection of the Westerdijk Fungal Biodiversity Institute, Utrecht, the Netherlands; CCF: Culture Collection of Fungi, Prague, Czech Republic; FMR: Facultat de Medicina i Ciències de la Salut, Reus, Spain; GZUIFR: Institute of Fungus Resources, Guizhou University, Guiyang City, Guizhou, China; MAFF: National Institute of Agrobiological Sciences, Ibaraki, Japan; MFLUCC: Mae Fah Luang University Culture Collection, Thailand. <sup>†</sup> indicates ex-type strains. “NA” indicates sequences not used in this study. “-” indicates the absence of that sequence. <sup>†</sup>ITS: Internal transcribed spacer region of the rDNA and 5.8S gene; LSU: 28S large ribosomal subunit; *tef1*: translation elongation factor 1 $\alpha$ .

## References

- Vu, D.; Groenewald, M.; de Vries, M.; Gehrman, T.; Stielow, B.; Eberhardt, U.; Al-Hatmi, A.; Groenewald, J.Z.; Cardinali, G.; Houbraken, J.; et al. Large-Scale Generation and Analysis of Filamentous Fungal DNA Barcodes Boosts Coverage for Kingdom Fungi and Reveals Thresholds for Fungal Species and Higher Taxon Delimitation. *Stud. Mycol.* **2019**, *92*, 135–154, doi:10.1016/j.simyco.2018.05.001.
- Giraldo, A.; Gené, J.; Cano, J.; de Hoog, S.; Guarro, J. Two New Species of *Acremonium* from Spanish Soils. *Mycol.* **2012**, *104*, 1456–1465, doi:10.3852/11-402.
- Crous, P.W.; Cowan, D.A.; Maggs-Kölling, G.; Yilmaz, N.; Larsson, E.; Angelini, C.; Brandrud, T.E.; Dearnaley, J.D.W.; Dima, B.; Dovana, F.; et al. Fungal Planet Description Sheets: 1112–1181. *Persoonia* **2020**, *45*, 251–409, doi:10.3767/persoonia.2020.45.10.
- Li, X.; Zhang, Z.-Y.; Ren, Y.-L.; Chen, W.-H.; Liang, J.-D.; Pan, J.-M.; Huang, J.-Z.; Liang, Z.-Q.; Han, Y.-F. Morphological Characteristics and Phylogenetic Evidence Reveal Two New Species of *Acremonium* (*Hypocreales*, *Sordariomycetes*). *MycoKeys* **2022**, *91*, 85–96, doi:10.3897/mycokeys.91.86257.
- Grum-Grzhimaylo, A.A.; Georgieva, M.L.; Debets, A.J.M.; Bilanenko, E.N. Are Alkalitolerant Fungi of the *Emericellopsis* Lineage (*Bionectriaceae*) of Marine Origin? *IMA Fungus* **2013**, *4*, 213–228, doi:10.5598/imafungus.2013.04.02.07.
- Rehner, S.A.; Minnis, A.M.; Sung, G.-H.; Luangsa-ard, J.J.; Devotto, L.; Humber, R.A. Phylogeny and Systematics of the Anamorphic, Entomopathogenic Genus *Beauveria*. *Mycol.* **2011**, *103*, 1055–1073, doi:10.3852/10-302.
- Lombard, L.; van der Merwe, N.A.; Groenewald, J.Z.; Crous, P.W. Generic Concepts in *Nectriaceae*. *Stud. Mycol.* **2015**, *80*, 189–245, doi:10.1016/j.simyco.2014.12.002.
- Schroers, H.-J. *A Monograph of Bionectria (Ascomycota, Hypocreales, Bionectriaceae) and Its Clonostachys Anamorphs*; Centraalbureau voor Schimmelcultures Utrecht, 2001;
- Perera, R.H.; Hyde, K.D.; Jones, E.B.G.; Maharachchikumbura, S.S.N.; Bundhun, D.; Camporesi, E.; Akulov, A.; Liu, J.K.; Liu, Z.Y. Profile of *Bionectriaceae*, *Calcarisporiaceae*, *Hypocreaceae*, *Nectriaceae*, *Tilachlidiaceae*, *Ijuhyaceae* fam. nov., *Stromatonectriaceae* fam. nov. and *Xanthonectriaceae* fam. nov. *Fungal Divers.* **2023**, *118*, 95–271, doi:10.1007/s13225-022-00512-1.
- Mongkolsamrit, S.; Noisriboom, W.; Thanakitpipattana, D.; Wutikhun, T.; Spatafora, J.W.; Luangsa-ard, J. Disentangling Cryptic Species with isaria-like Morphs in *Cordycipitaceae*. *Mycol.* **2018**, *110*, 230–257, doi:10.1080/00275514.2018.1446651.
- Lin, C.-G.; Chen, Y.; McKenzie, E.H.C.; Bhat, D.J.; Ariyawansa, H.A.; Hyde, K.D.; Wang, Y. The Genus *Fusariella*. *Mycol. Progress* **2016**, *15*, 1313–1326, doi:10.1007/s11557-016-1246-0.
- Huang, Y.-T.; Kolařík, M.; Kasson, M.T.; Hulcr, J. Two New *Geosmithia* Species in *G. pallida* Species Complex from Bark Beetles in Eastern USA. *Mycol.* **2017**, *109*, 790–803, doi:10.1080/00275514.2017.1410422.
- Kolařík, M.; Kirkendall, L.R. Evidence for a New Lineage of Primary *Ambrosia* Fungi in *Geosmithia* Pitt (*Ascomycota: Hypocreales*). *Fungal Biol.* **2010**, *114*, 676–689, doi:10.1016/j.funbio.2010.06.005.
- Kiyuna, T.; An, K.-D.; Kigawa, R.; Sano, C.; Miura, S.; Sugiyama, J. Molecular Assessment of Fungi in “Black Spots” That Deface Murals in the Takamatsuzuka and Kitora Tumuli in Japan: *Acremonium* sect. *Gliomastix* Including *Acremonium tumulicola* sp. nov. and *Acremonium felinum* comb. nov. *Mycoscience* **2011**, *52*, 1–17, doi:10.1007/S10267-010-0063-6.

15. Lechat C., M.P.-A. *Lasionectriopsis*, a New Genus in the *Bionectriaceae*, Based on the New Species *L. germanica* Available online: <https://ascomycete.org/Journal/Article/art-0250> (accessed on 14 May 2023).
16. Lechat, C.; Fournier, J. Two New Species of *Lasionectria* (*Bionectriaceae*, *Hypocreales*) from Guadeloupe and Martinique (French West Indies). *Mycotaxon* **2013**, *121*, 275–280, doi:10.5248/121.275.
17. Zare, R.; Gams, W. More white verticillium-like anamorphs with erect conidiophores. *Mycol Progress* **2016**, *15*, 993–1030, doi:10.1007/s11557-016-1214-8.
18. Castlebury, L.A.; Rossman, A.Y.; Sung, G.-H.; Hyten, A.S.; Spatafora, J.W. Multigene Phylogeny Reveals New Lineage for *Stachybotrys chartarum*, the Indoor Air Fungus. *Mycol. Res.* **2004**, *108*, 864–872, doi:10.1017/S0953756204000607.
19. Crous, P.W.; Wingfield, M.J.; Richardson, D.M.; Leroux, J.J.; Strasberg, D.; Edwards, J.; Roets, F.; Hubka, V.; Taylor, P.W.J.; Heykoop, M.; et al. Fungal Planet Description Sheets: 400–468. *Persoonia* **2016**, *36*, 316–458, doi:10.3767/003158516X692185.
20. Tibpromma, S.; Hyde, K.D.; McKenzie, E.H.C.; Bhat, D.J.; Phillips, A.J.L.; Wanasinghe, D.N.; Samarakoon, M.C.; Jayawardena, R.S.; Dissanayake, A.J.; Tennakoon, D.S.; et al. Fungal Diversity Notes 840–928: Micro-Fungi Associated with *Pandanaceae*. *Fungal Diversity* **2018**, *93*, 1–160, doi:10.1007/s13225-018-0408-6.
21. Lechat C., F.J. New Insights into *Stilbocrea* (*Hypocreales*, *Bionectriaceae*): Recognition of *S. colubrensis*, a New Species from Martinique (French West Indies), and Observations on Lifestyle and Synnematos Asexual Morphs of *S. gracilipes* and *S. macrostoma*. Available online: <https://ascomycete.org/es/Revista/Art%3%adculo/art-0272> (accessed on 14 May 2023).
22. Voglmayr, H.; Jaklitsch, W.M. *Stilbocrea walteri* sp. nov., an Unusual Species of *Bionectriaceae*. *Mycol Progress* **2019**, *18*, 91–105, doi:10.1007/s11557-018-1427-0.
23. Crous, P.W.; Wingfield, M.J.; Burgess, T.I.; Hardy, G.E.St.J.; Crane, C.; Barrett, S.; Cano-Lira, J.F.; Le Roux, J.J.; Thangavel, R.; Guarro, J.; et al. Fungal Planet Description Sheets: 469–557. *Persoonia* **2016**, *37*, 218–403, doi:10.3767/003158516X694499.
24. Chaverri, P.; Salgado, C.; Hirooka, Y.; Rossman, A.Y.; Samuels, G.J. Delimitation of *Neonectria* and *Cylindrocarpon* (*Nectriaceae*, *Hypocreales*, *Ascomycota*) and Related Genera with cylindrocarpon-like Anamorphs. *Stud. Mycol.* **2011**, *68*, 57–78, doi:10.3114/sim.2011.68.03.
25. Hirooka, Y.; Kobayashi, T.; Ono, T.; Rossman, A.Y.; Chaverri, P. *Verrucostoma*, a New Genus in the *Bionectriaceae* from the Bonin Islands, Japan. *Mycol.* **2010**, *102*, 418–429, doi:10.3852/09-137.

Table S2: Phylogenetic distance between *Amphichorda* species for the *BenA* region.

|                                              |       |       |       |       |       |       |       |       |       |       |       |       |       |       |       |       |
|----------------------------------------------|-------|-------|-------|-------|-------|-------|-------|-------|-------|-------|-------|-------|-------|-------|-------|-------|
| Strains                                      |       |       |       |       |       |       |       |       |       |       |       |       |       |       |       |       |
| <i>Amphichorda littoralis</i> FMR_19404      |       |       |       |       |       |       |       |       |       |       |       |       |       |       |       |       |
| FMR 17952                                    | 0,000 |       |       |       |       |       |       |       |       |       |       |       |       |       |       |       |
| FMR 19611                                    | 0,000 | 0,000 |       |       |       |       |       |       |       |       |       |       |       |       |       |       |
| FMR 20067                                    | 0,000 | 0,000 | 0,000 |       |       |       |       |       |       |       |       |       |       |       |       |       |
| FMR 20149                                    | 0,000 | 0,000 | 0,000 | 0,000 |       |       |       |       |       |       |       |       |       |       |       |       |
| <i>Amphichorda cavernicola</i> CGMCC 3.19571 |       |       |       |       |       |       |       |       |       |       |       |       |       |       |       |       |
| LC12674                                      | 0,076 | 0,076 | 0,076 | 0,076 | 0,076 |       |       |       |       |       |       |       |       |       |       |       |
| LC12560                                      | 0,076 | 0,076 | 0,076 | 0,076 | 0,076 | 0,000 | 0,000 |       |       |       |       |       |       |       |       |       |
| <i>Amphichorda guana</i> CGMCC 3.17908       |       |       |       |       |       |       |       |       |       |       |       |       |       |       |       |       |
| CGMCC 3.17909                                | 0,095 | 0,095 | 0,095 | 0,095 | 0,095 | 0,038 | 0,038 | 0,038 |       |       |       |       |       |       |       |       |
| CBS 312.50                                   | 0,090 | 0,090 | 0,090 | 0,090 | 0,090 | 0,042 | 0,042 | 0,042 | 0,018 | 0,018 |       |       |       |       |       |       |
| <i>Amphichorda felina</i> CBS 250.34         |       |       |       |       |       |       |       |       |       |       |       |       |       |       |       |       |
| CBS 648.66                                   | 0,080 | 0,080 | 0,080 | 0,080 | 0,080 | 0,030 | 0,030 | 0,030 | 0,022 | 0,022 | 0,026 |       |       |       |       |       |
| CBS 110.08                                   | 0,080 | 0,080 | 0,080 | 0,080 | 0,080 | 0,034 | 0,034 | 0,034 | 0,026 | 0,026 | 0,030 | 0,007 | 0,007 |       |       |       |
| <i>Amphichorda coprophila</i> CBS 173.71     |       |       |       |       |       |       |       |       |       |       |       |       |       |       |       |       |
| CBS 424.88                                   | 0,041 | 0,041 | 0,041 | 0,041 | 0,041 | 0,058 | 0,058 | 0,058 | 0,080 | 0,080 | 0,076 | 0,066 | 0,066 | 0,067 | 0,000 |       |
| CBS 247.82                                   | 0,041 | 0,041 | 0,041 | 0,041 | 0,041 | 0,058 | 0,058 | 0,058 | 0,080 | 0,080 | 0,076 | 0,066 | 0,066 | 0,067 | 0,000 | 0,000 |
